# Supplementary material for: Mössbauer properties of the diferric cluster and the differential iron(ii)-binding affinity of the iron sites in protein R2 of class Ia Escherichia coli ribonucleotide reductase: a DFT/electrostatics study
Source: Royal Society of Chemistry journal article supplement (doi:10.1039/c1dt10950b), 2011-01-01
Supplement: c1dt10950b.pdf [file c1dt10950b.pdf]

## Supporting Information

### Mössbauer Properties of the Diferric Cluster and the Differential Iron(II)- Binding Affinity of the Iron Sites in Protein R2 of Class Ia *Escherichia coli* Ribonucleotide Reductase: A DFT/Electrostatics Study

Wen-Ge Han,<sup>†</sup> Gregory M. Sandala,<sup>†</sup> Debra Ann Giammona,<sup>‡</sup>  
Donald Bashford,<sup>‡</sup> and Louis Noodleman<sup>\*,†</sup>

<sup>†</sup> Department of Molecular Biology, TPC15, The Scripps Research Institute, 10550  
North Torrey Pines Road, La Jolla, CA 92037

<sup>‡</sup> Structural Biology, St. Jude Children's Research Hospital, 262 Danny Thomas  
Place, Memphis, TN 38105

\*To whom correspondence should be addressed.

E-mail: lou@scripps.edu.

Tel: (858) 784-2840.

### Cartesian coordinates of the OPBE/COSMO optimized met-diferric cluster 'Cys-71':

162

|    |           |           |           |
|----|-----------|-----------|-----------|
| Fe | 5.321077  | 9.939453  | 48.262022 |
| Fe | 4.006520  | 9.624968  | 45.249955 |
| C  | 11.598304 | 13.667180 | 41.478804 |
| C  | 10.527534 | 13.978209 | 42.492599 |
| O  | 9.447109  | 13.366253 | 42.514508 |
| N  | 10.806287 | 14.985203 | 43.339684 |
| H  | 11.531061 | 14.427072 | 40.691653 |
| C  | 13.747888 | 18.618548 | 50.167965 |
| C  | 12.520465 | 17.767296 | 50.100990 |
| C  | 11.832421 | 17.431319 | 48.956963 |
| C  | 11.859961 | 17.073145 | 51.171488 |
| N  | 10.787335 | 16.594757 | 49.246582 |
| C  | 10.772652 | 16.354491 | 50.594066 |
| C  | 12.068084 | 16.974569 | 52.561847 |
| C  | 9.899883  | 15.578830 | 51.362957 |
| C  | 11.211016 | 16.191255 | 53.323036 |
| C  | 10.134224 | 15.502278 | 52.729424 |
| H  | 14.632685 | 18.029476 | 49.907425 |
| C  | 5.248099  | 6.763965  | 50.694911 |
| C  | 4.486797  | 7.549682  | 49.660170 |
| O  | 3.787766  | 6.992219  | 48.801168 |
| O  | 4.651146  | 8.843431  | 49.739594 |
| H  | 4.930928  | 5.726455  | 50.723063 |
| C  | 9.090209  | 8.017669  | 40.133266 |
| C  | 7.680169  | 7.608764  | 40.434069 |
| C  | 6.967199  | 7.927450  | 41.566961 |
| C  | 6.778995  | 6.834706  | 39.617141 |
| N  | 5.703420  | 7.399095  | 41.514885 |
| C  | 5.550290  | 6.728749  | 40.331170 |
| C  | 6.867594  | 6.215050  | 38.354292 |
| C  | 4.445879  | 6.028214  | 39.837207 |
| C  | 5.769854  | 5.522576  | 37.858069 |
| C  | 4.571947  | 5.426477  | 38.593368 |
| H  | 9.584657  | 8.475607  | 41.006200 |
| C  | 8.567174  | 6.748702  | 47.026149 |
| C  | 7.554267  | 7.043790  | 45.935075 |
| C  | 6.382926  | 7.920697  | 46.335415 |
| O  | 6.430049  | 8.445326  | 47.499551 |
| O  | 5.465997  | 8.073787  | 45.478470 |
| H  | 8.899493  | 7.672761  | 47.513045 |
| C  | 7.940099  | 10.125837 | 50.791247 |
| C  | 7.843074  | 11.170834 | 49.742240 |
| N  | 6.835172  | 11.220257 | 48.799952 |
| C  | 8.662346  | 12.253336 | 49.532792 |
| C  | 7.048790  | 12.309484 | 48.065432 |
| N  | 8.139794  | 12.953971 | 48.477220 |
| H  | 8.580664  | 10.498104 | 51.586204 |
| C  | 6.513518  | 8.813930  | 57.333113 |
| C  | 5.715865  | 9.305131  | 56.164463 |
| C  | 5.131049  | 10.578054 | 56.199290 |
| C  | 5.551828  | 8.545626  | 55.005493 |
| C  | 4.404832  | 11.086610 | 55.128770 |

|   |           |           |           |
|---|-----------|-----------|-----------|
| C | 4.822440  | 9.037864  | 53.929343 |
| C | 4.248360  | 10.305840 | 53.983498 |
| O | 3.533494  | 10.818722 | 52.931628 |
| H | 7.046225  | 9.667139  | 57.743464 |
| C | -0.109439 | 9.370145  | 43.588733 |
| C | 0.807884  | 8.216286  | 43.985661 |
| C | 2.102318  | 8.183445  | 43.191889 |
| O | 2.081844  | 7.849663  | 41.990026 |
| O | 3.216880  | 8.484103  | 43.782445 |
| H | -1.005990 | 9.358163  | 44.211812 |
| C | 2.120869  | 14.067363 | 45.712767 |
| C | 1.157853  | 12.883727 | 45.807326 |
| C | 1.832904  | 11.553711 | 46.112430 |
| O | 1.700908  | 11.046284 | 47.263936 |
| O | 2.481035  | 11.016283 | 45.152285 |
| H | 2.825016  | 13.965307 | 44.877012 |
| C | 3.765708  | 11.106962 | 41.781544 |
| C | 5.016312  | 11.246040 | 42.566259 |
| N | 5.247393  | 10.722715 | 43.826791 |
| C | 6.150806  | 11.904717 | 42.163184 |
| C | 6.487832  | 11.066674 | 44.155886 |
| N | 7.059779  | 11.772397 | 43.174518 |
| H | 3.974147  | 11.464150 | 40.770355 |
| C | 7.160786  | 15.018115 | 45.789287 |
| C | 8.451307  | 15.675165 | 46.249305 |
| O | 8.977785  | 16.554542 | 45.504644 |
| O | 8.942522  | 15.298720 | 47.362577 |
| H | 6.690327  | 15.545148 | 44.958416 |
| O | 2.651436  | 8.500921  | 46.730616 |
| O | 3.733360  | 11.502116 | 49.121826 |
| O | 4.713775  | 10.487188 | 46.701571 |
| O | -0.037001 | 8.387997  | 40.236003 |
| H | 12.603985 | 13.714738 | 41.910369 |
| H | 11.421784 | 12.681480 | 41.044277 |
| H | 11.672939 | 15.494904 | 43.265795 |
| H | 10.102961 | 15.342971 | 43.973661 |
| H | 13.697960 | 19.460165 | 49.466679 |
| H | 13.908470 | 19.030309 | 51.169642 |
| H | 12.020113 | 17.727593 | 47.930944 |
| H | 10.161721 | 16.184586 | 48.550260 |
| H | 9.059309  | 15.058495 | 50.908671 |
| H | 9.471286  | 14.899605 | 53.349185 |
| H | 11.370021 | 16.106298 | 54.397516 |
| H | 12.893283 | 17.501448 | 53.040900 |
| H | 6.315799  | 6.812982  | 50.451819 |
| H | 5.127164  | 7.202648  | 51.684439 |
| H | 9.702121  | 7.161163  | 39.820862 |
| H | 9.131931  | 8.747823  | 39.311800 |
| H | 7.280770  | 8.504662  | 42.427791 |
| H | 4.963486  | 7.581871  | 42.180633 |
| H | 3.523093  | 5.962288  | 40.409079 |
| H | 3.725874  | 4.876956  | 38.181193 |
| H | 5.830249  | 5.046928  | 36.879493 |
| H | 7.782052  | 6.278512  | 37.764315 |
| H | 8.143148  | 6.101978  | 47.803026 |
| H | 9.441591  | 6.239454  | 46.603538 |
| H | 7.135520  | 6.124478  | 45.505422 |

|   |           |           |           |
|---|-----------|-----------|-----------|
| H | 8.032862  | 7.560942  | 45.090604 |
| H | 6.962479  | 9.911640  | 51.229297 |
| H | 8.355017  | 9.185260  | 50.409741 |
| H | 6.415691  | 12.635027 | 47.255055 |
| H | 8.478788  | 13.856613 | 48.059876 |
| H | 9.561050  | 12.569246 | 50.047111 |
| H | 5.875025  | 8.402958  | 58.127173 |
| H | 7.236264  | 8.042001  | 57.049679 |
| H | 5.256469  | 11.198372 | 57.087772 |
| H | 3.963656  | 12.081032 | 55.171151 |
| H | 3.490402  | 10.124054 | 52.258750 |
| H | 4.702317  | 8.439811  | 53.032758 |
| H | 6.011092  | 7.559008  | 54.930018 |
| H | 0.385092  | 10.335052 | 43.731318 |
| H | -0.428675 | 9.299871  | 42.545901 |
| H | 0.299011  | 7.261779  | 43.794125 |
| H | 1.034440  | 8.261005  | 45.050673 |
| H | 1.551011  | 14.992046 | 45.556446 |
| H | 2.701180  | 14.189108 | 46.636446 |
| H | 0.621380  | 12.778243 | 44.855619 |
| H | 0.415343  | 13.068977 | 46.591280 |
| H | 3.436416  | 10.067514 | 41.720610 |
| H | 2.944795  | 11.693420 | 42.209769 |
| H | 6.994821  | 10.820519 | 45.075519 |
| H | 7.989269  | 12.178764 | 43.178063 |
| H | 6.379182  | 12.434787 | 41.247660 |
| H | 7.376734  | 13.997710 | 45.456178 |
| H | 6.452039  | 14.961272 | 46.620759 |
| H | 0.662896  | 8.155299  | 40.886389 |
| H | -0.663707 | 7.655527  | 40.317931 |
| H | 2.253969  | 9.324786  | 47.104133 |
| H | 3.075258  | 8.031552  | 47.486861 |
| H | 3.020113  | 11.405003 | 48.448781 |
| H | 3.319363  | 11.147546 | 49.921576 |
| C | 7.544078  | 21.950378 | 45.129163 |
| N | 8.701138  | 21.359865 | 45.765739 |
| C | 9.821063  | 21.984864 | 46.110108 |
| N | 9.967286  | 23.305157 | 46.011248 |
| N | 10.864573 | 21.247052 | 46.557255 |
| H | 6.808277  | 21.161638 | 44.962340 |
| H | 7.800505  | 22.387615 | 44.159508 |
| H | 7.077612  | 22.715454 | 45.760377 |
| H | 8.673512  | 20.367074 | 46.028932 |
| H | 9.280501  | 23.892292 | 45.532834 |
| H | 10.898965 | 23.682563 | 46.093102 |
| H | 10.629547 | 20.294217 | 46.822342 |
| H | 11.510539 | 21.717911 | 47.174366 |
| O | 9.218018  | 18.842256 | 46.817134 |
| H | 8.831977  | 18.665498 | 47.683665 |
| H | 9.190232  | 17.963944 | 46.343209 |
| O | 8.297001  | 25.088000 | 44.647000 |
| H | 8.768150  | 25.862341 | 44.307121 |
| H | 7.486531  | 25.467797 | 45.013969 |

**Cartesian coordinates of the met-diferric cluster 'Cys-17' obtained from the trajectory of the geometry optimization starting from the X-ray crystal structure:**

162

|    |           |           |           |
|----|-----------|-----------|-----------|
| Fe | 5.203431  | 9.927497  | 48.272202 |
| Fe | 4.062224  | 9.662733  | 45.243479 |
| C  | 11.637773 | 13.716375 | 41.515203 |
| C  | 10.578512 | 14.059071 | 42.531059 |
| O  | 9.477415  | 13.488108 | 42.550305 |
| N  | 10.891577 | 15.057145 | 43.378992 |
| H  | 11.531061 | 14.427072 | 40.691653 |
| C  | 13.707678 | 18.536223 | 50.194517 |
| C  | 12.517801 | 17.637034 | 50.060737 |
| C  | 11.889253 | 17.300154 | 48.881738 |
| C  | 11.796930 | 16.946543 | 51.095589 |
| N  | 10.827445 | 16.469815 | 49.117815 |
| C  | 10.735564 | 16.236980 | 50.462449 |
| C  | 11.927518 | 16.839780 | 52.495065 |
| C  | 9.803644  | 15.482690 | 51.180398 |
| C  | 11.017524 | 16.067393 | 53.205827 |
| C  | 9.959698  | 15.401249 | 52.556997 |
| H  | 14.632685 | 18.029476 | 49.907425 |
| C  | 5.227951  | 6.753305  | 50.834207 |
| C  | 4.530905  | 7.616636  | 49.821814 |
| O  | 3.755000  | 7.139571  | 48.974737 |
| O  | 4.827012  | 8.878798  | 49.917925 |
| H  | 4.930928  | 5.726455  | 50.723063 |
| C  | 9.017217  | 8.077183  | 40.148689 |
| C  | 7.635276  | 7.670097  | 40.557336 |
| C  | 7.022052  | 8.009908  | 41.740588 |
| C  | 6.661868  | 6.900487  | 39.824013 |
| N  | 5.753598  | 7.497998  | 41.797766 |
| C  | 5.492662  | 6.825595  | 40.634400 |
| C  | 6.636234  | 6.264357  | 38.567092 |
| C  | 4.334579  | 6.153170  | 40.236283 |
| C  | 5.485150  | 5.596079  | 38.166707 |
| C  | 4.344667  | 5.541282  | 38.991742 |
| H  | 9.584657  | 8.475607  | 41.006200 |
| C  | 8.501690  | 6.758621  | 47.058985 |
| C  | 7.537937  | 7.096839  | 45.940044 |
| C  | 6.353672  | 7.958161  | 46.329525 |
| O  | 6.342307  | 8.440007  | 47.508792 |
| O  | 5.472760  | 8.137928  | 45.437058 |
| H  | 8.899493  | 7.672761  | 47.513045 |
| C  | 7.764479  | 10.220475 | 50.920743 |
| C  | 7.698477  | 11.191009 | 49.800324 |
| N  | 6.683215  | 11.228332 | 48.860393 |
| C  | 8.558600  | 12.222700 | 49.517393 |
| C  | 6.939811  | 12.261471 | 48.058989 |
| N  | 8.059902  | 12.881797 | 48.423945 |
| H  | 8.580664  | 10.498104 | 51.586204 |
| C  | 6.449063  | 8.830841  | 57.389178 |
| C  | 5.709793  | 9.288682  | 56.170753 |
| C  | 5.095386  | 10.549106 | 56.134915 |
| C  | 5.639095  | 8.499043  | 55.023594 |

|   |           |           |           |
|---|-----------|-----------|-----------|
| C | 4.426063  | 11.010346 | 55.006508 |
| C | 4.974534  | 8.948432  | 53.890642 |
| C | 4.366049  | 10.199611 | 53.872784 |
| O | 3.711750  | 10.667655 | 52.764007 |
| H | 7.046225  | 9.667139  | 57.743464 |
| C | -0.155505 | 9.370662  | 43.529214 |
| C | 0.822623  | 8.264105  | 43.911376 |
| C | 2.127507  | 8.324911  | 43.137847 |
| O | 2.112145  | 8.186574  | 41.899273 |
| O | 3.239201  | 8.485935  | 43.785608 |
| H | -1.005990 | 9.358163  | 44.211812 |
| C | 2.053906  | 14.019065 | 45.657436 |
| C | 1.097882  | 12.825501 | 45.609031 |
| C | 1.761404  | 11.500855 | 45.953366 |
| O | 1.522507  | 10.959629 | 47.072669 |
| O | 2.520345  | 11.004361 | 45.057495 |
| H | 2.825016  | 13.965307 | 44.877012 |
| C | 3.822204  | 11.052082 | 41.765571 |
| C | 5.081971  | 11.215172 | 42.526964 |
| N | 5.308587  | 10.744349 | 43.809422 |
| C | 6.223916  | 11.842175 | 42.094758 |
| C | 6.552710  | 11.088503 | 44.123371 |
| N | 7.132582  | 11.743597 | 43.111128 |
| H | 3.974147  | 11.464150 | 40.770355 |
| C | 7.185829  | 14.933847 | 45.709222 |
| C | 8.477298  | 15.566997 | 46.189460 |
| O | 8.972582  | 16.512032 | 45.505989 |
| O | 9.004980  | 15.108982 | 47.252795 |
| H | 6.690327  | 15.545148 | 44.958416 |
| O | 2.688798  | 8.457545  | 46.717582 |
| O | 3.388900  | 11.069686 | 49.069270 |
| O | 4.718133  | 10.554144 | 46.690622 |
| O | -0.037001 | 8.387997  | 40.236003 |
| H | 12.652546 | 13.812072 | 41.914365 |
| H | 11.473822 | 12.706338 | 41.134921 |
| H | 11.780934 | 15.528176 | 43.317366 |
| H | 10.202760 | 15.426432 | 44.022102 |
| H | 13.616261 | 19.420158 | 49.551057 |
| H | 13.831679 | 18.891379 | 51.222238 |
| H | 12.129417 | 17.595528 | 47.865786 |
| H | 10.226099 | 16.065498 | 48.398933 |
| H | 8.976366  | 14.985027 | 50.680638 |
| H | 9.249060  | 14.815758 | 53.139359 |
| H | 11.119073 | 15.975410 | 54.286542 |
| H | 12.735194 | 17.347916 | 53.021718 |
| H | 6.312643  | 6.854919  | 50.730949 |
| H | 4.962302  | 7.058609  | 51.845113 |
| H | 9.587595  | 7.235889  | 39.735321 |
| H | 8.997550  | 8.856235  | 39.372877 |
| H | 7.413735  | 8.593346  | 42.563135 |
| H | 5.063590  | 7.723016  | 42.503279 |
| H | 3.455995  | 6.128396  | 40.876563 |
| H | 3.451375  | 5.019389  | 38.649135 |
| H | 5.454987  | 5.111560  | 37.190677 |
| H | 7.502144  | 6.299917  | 37.905777 |
| H | 8.010541  | 6.182735  | 47.851274 |
| H | 9.338212  | 6.164362  | 46.673402 |

|   |           |           |           |
|---|-----------|-----------|-----------|
| H | 7.134975  | 6.198881  | 45.454771 |
| H | 8.052898  | 7.648062  | 45.139776 |
| H | 6.842609  | 10.237004 | 51.507490 |
| H | 7.920418  | 9.192937  | 50.574852 |
| H | 6.318436  | 12.548790 | 47.225667 |
| H | 8.442398  | 13.748103 | 47.957207 |
| H | 9.474127  | 12.530118 | 50.004704 |
| H | 5.771698  | 8.540556  | 58.203271 |
| H | 7.108914  | 7.983957  | 57.176742 |
| H | 5.149249  | 11.197727 | 57.010183 |
| H | 3.960034  | 11.994248 | 54.988795 |
| H | 3.832863  | 10.007391 | 52.067188 |
| H | 4.937570  | 8.328577  | 53.004632 |
| H | 6.117267  | 7.518748  | 55.005035 |
| H | 0.310940  | 10.356926 | 43.598993 |
| H | -0.539445 | 9.253665  | 42.513600 |
| H | 0.375993  | 7.284557  | 43.687404 |
| H | 1.030218  | 8.284444  | 44.979946 |
| H | 1.490233  | 14.948011 | 45.504567 |
| H | 2.554988  | 14.092361 | 46.631471 |
| H | 0.675705  | 12.742563 | 44.599243 |
| H | 0.268691  | 12.978806 | 46.308791 |
| H | 3.537280  | 10.001908 | 41.661744 |
| H | 2.986522  | 11.574969 | 42.242001 |
| H | 7.055278  | 10.882032 | 45.055470 |
| H | 8.060809  | 12.151139 | 43.105709 |
| H | 6.461161  | 12.326082 | 41.156195 |
| H | 7.404290  | 13.960847 | 45.257923 |
| H | 6.498519  | 14.777511 | 46.544540 |
| H | 0.707189  | 8.279972  | 40.878517 |
| H | -0.653853 | 7.689952  | 40.495998 |
| H | 2.176739  | 9.249739  | 47.003614 |
| H | 3.061776  | 8.060011  | 47.536829 |
| H | 2.741390  | 11.110673 | 48.322788 |
| H | 2.944844  | 10.490364 | 49.704065 |
| C | 7.549522  | 21.928961 | 45.208527 |
| N | 8.685643  | 21.290936 | 45.835244 |
| C | 9.833341  | 21.881137 | 46.163186 |
| N | 10.055431 | 23.171461 | 45.916717 |
| N | 10.796414 | 21.145508 | 46.736423 |
| H | 6.808277  | 21.161638 | 44.962340 |
| H | 7.834820  | 22.422852 | 44.275075 |
| H | 7.076629  | 22.661778 | 45.874403 |
| H | 8.620707  | 20.303546 | 46.114740 |
| H | 9.348896  | 23.768229 | 45.499819 |
| H | 10.938127 | 23.584347 | 46.170710 |
| H | 10.592209 | 20.185099 | 46.982520 |
| H | 11.640017 | 21.581700 | 47.070068 |
| O | 9.096784  | 18.778309 | 46.889610 |
| H | 8.548071  | 18.591134 | 47.666098 |
| H | 9.112939  | 17.913421 | 46.393012 |
| O | 8.297001  | 25.088000 | 44.647000 |
| H | 8.786510  | 25.826057 | 44.261909 |
| H | 7.379713  | 25.392312 | 44.613768 |

### Cartesian coordinates of the met-diferric cluster 'Rotate-Tyr122-Fix-Asp84':

162

|    |           |           |           |
|----|-----------|-----------|-----------|
| Fe | 5.203431  | 9.927497  | 48.272202 |
| Fe | 3.981389  | 9.636887  | 45.236768 |
| C  | 11.613289 | 13.678352 | 41.492225 |
| C  | 10.540833 | 13.990184 | 42.504293 |
| O  | 9.452782  | 13.391978 | 42.513613 |
| N  | 10.826688 | 14.986346 | 43.362426 |
| H  | 11.531061 | 14.427072 | 40.691653 |
| C  | 13.734068 | 18.591302 | 50.192371 |
| C  | 12.507610 | 17.737829 | 50.098816 |
| C  | 11.840756 | 17.405755 | 48.939819 |
| C  | 11.813389 | 17.052615 | 51.155130 |
| N  | 10.783575 | 16.577698 | 49.206673 |
| C  | 10.736143 | 16.340754 | 50.553628 |
| C  | 11.981461 | 16.958448 | 52.551630 |
| C  | 9.835126  | 15.575393 | 51.301005 |
| C  | 11.096796 | 16.185857 | 53.292169 |
| C  | 10.030833 | 15.501928 | 52.673276 |
| H  | 14.632685 | 18.029476 | 49.907425 |
| C  | 5.162919  | 6.766678  | 50.887412 |
| C  | 4.530905  | 7.616636  | 49.821814 |
| O  | 3.755000  | 7.139571  | 48.974737 |
| O  | 4.827012  | 8.878798  | 49.917925 |
| H  | 4.930928  | 5.726455  | 50.723063 |
| C  | 9.066906  | 8.008270  | 40.147904 |
| C  | 7.660607  | 7.603424  | 40.476923 |
| C  | 6.971921  | 7.933957  | 41.621193 |
| C  | 6.736677  | 6.829706  | 39.683004 |
| N  | 5.703351  | 7.416680  | 41.598536 |
| C  | 5.520348  | 6.741464  | 40.422116 |
| C  | 6.789148  | 6.198771  | 38.423384 |
| C  | 4.396689  | 6.053153  | 39.956051 |
| C  | 5.671723  | 5.517312  | 37.954216 |
| C  | 4.487763  | 5.442069  | 38.713529 |
| H  | 9.584657  | 8.475607  | 41.006200 |
| C  | 8.514167  | 6.757961  | 47.045089 |
| C  | 7.506043  | 7.068434  | 45.954116 |
| C  | 6.322229  | 7.931445  | 46.348262 |
| O  | 6.332030  | 8.434460  | 47.520668 |
| O  | 5.424204  | 8.091971  | 45.471596 |
| H  | 8.899493  | 7.672761  | 47.513045 |
| C  | 7.879714  | 10.152003 | 50.824762 |
| C  | 7.772255  | 11.167827 | 49.747657 |
| N  | 6.750257  | 11.206604 | 48.814215 |
| C  | 8.597815  | 12.237789 | 49.506537 |
| C  | 6.969966  | 12.280033 | 48.055929 |
| N  | 8.072008  | 12.921404 | 48.441730 |
| H  | 8.580664  | 10.498104 | 51.586204 |
| C  | 6.452526  | 8.811835  | 57.418449 |
| C  | 5.670477  | 9.235208  | 56.212982 |
| C  | 4.695117  | 10.238211 | 56.302690 |
| C  | 5.952002  | 8.714621  | 54.949833 |
| C  | 4.013535  | 10.700882 | 55.182799 |



|   |           |           |           |
|---|-----------|-----------|-----------|
| C | 5.285456  | 9.172603  | 53.819886 |
| C | 4.309756  | 10.160512 | 53.930186 |
| O | 3.629754  | 10.632330 | 52.836900 |
| H | 7.046225  | 9.667139  | 57.743464 |
| C | -0.134884 | 9.366044  | 43.557661 |
| C | 0.790674  | 8.222512  | 43.958992 |
| C | 2.089230  | 8.207118  | 43.176611 |
| O | 2.076245  | 7.921309  | 41.963143 |
| O | 3.200638  | 8.468562  | 43.793170 |
| H | -1.005990 | 9.358163  | 44.211812 |
| C | 2.078369  | 14.070224 | 45.673259 |
| C | 1.116200  | 12.883479 | 45.717776 |
| C | 1.786276  | 11.555905 | 46.039510 |
| O | 1.623271  | 11.044520 | 47.185111 |
| O | 2.462299  | 11.021780 | 45.098130 |
| H | 2.825016  | 13.965307 | 44.877012 |
| C | 3.755397  | 11.115933 | 41.779103 |
| C | 5.006278  | 11.250058 | 42.563170 |
| N | 5.238035  | 10.730278 | 43.824140 |
| C | 6.142571  | 11.901663 | 42.153072 |
| C | 6.481947  | 11.067813 | 44.147646 |
| N | 7.054478  | 11.767840 | 43.161636 |
| H | 3.974147  | 11.464150 | 40.770355 |
| C | 7.159006  | 15.007104 | 45.780569 |
| C | 8.445190  | 15.662245 | 46.252640 |
| O | 8.965774  | 16.561036 | 45.527495 |
| O | 8.936798  | 15.263140 | 47.357444 |
| H | 6.690327  | 15.545148 | 44.958416 |
| O | 2.613071  | 8.489508  | 46.757320 |
| O | 3.566395  | 11.325633 | 49.112402 |
| O | 4.658404  | 10.504352 | 46.697173 |
| O | -0.037001 | 8.387997  | 40.236003 |
| H | 12.619186 | 13.740911 | 41.922237 |
| H | 11.448348 | 12.682223 | 41.076586 |
| H | 11.705263 | 15.477373 | 43.306049 |
| H | 10.124194 | 15.348548 | 43.994545 |
| H | 13.672322 | 19.460826 | 49.526367 |
| H | 13.889909 | 18.967906 | 51.208462 |
| H | 12.053431 | 17.698605 | 47.917299 |
| H | 10.166175 | 16.169397 | 48.500892 |
| H | 9.002160  | 15.061922 | 50.825648 |
| H | 9.345026  | 14.909426 | 53.277720 |
| H | 11.223330 | 16.107960 | 54.371505 |
| H | 12.795332 | 17.482999 | 53.051783 |
| H | 6.246912  | 6.915451  | 50.903088 |
| H | 4.765143  | 7.051728  | 51.865129 |
| H | 9.670728  | 7.148448  | 39.828464 |
| H | 9.092445  | 8.731074  | 39.319090 |
| H | 7.308335  | 8.513261  | 42.471427 |
| H | 4.977374  | 7.611236  | 42.276260 |
| H | 3.485003  | 6.007143  | 40.546938 |
| H | 3.624565  | 4.904813  | 38.320730 |
| H | 5.703674  | 5.037792  | 36.975916 |
| H | 7.689513  | 6.248274  | 37.810833 |
| H | 8.071183  | 6.143594  | 47.837226 |
| H | 9.361025  | 6.203954  | 46.622385 |
| H | 7.094680  | 6.151495  | 45.511864 |

|   |           |           |           |
|---|-----------|-----------|-----------|
| H | 7.987957  | 7.594805  | 45.117384 |
| H | 6.916808  | 10.007838 | 51.313910 |
| H | 8.213164  | 9.177349  | 50.449241 |
| H | 6.335080  | 12.592766 | 47.242024 |
| H | 8.420735  | 13.816782 | 48.016207 |
| H | 9.505965  | 12.554059 | 50.002229 |
| H | 5.808586  | 8.519071  | 58.255871 |
| H | 7.134755  | 7.986035  | 57.195018 |
| H | 4.468045  | 10.681313 | 57.273213 |
| H | 3.262547  | 11.484914 | 55.266762 |
| H | 3.927176  | 10.113149 | 52.076516 |
| H | 5.538317  | 8.769186  | 52.846171 |
| H | 6.719091  | 7.947825  | 54.835507 |
| H | 0.357812  | 10.336174 | 43.666738 |
| H | -0.484593 | 9.273577  | 42.526700 |
| H | 0.293258  | 7.263266  | 43.759960 |
| H | 1.006829  | 8.264327  | 45.026069 |
| H | 1.516547  | 14.993600 | 45.484399 |
| H | 2.609516  | 14.194074 | 46.625787 |
| H | 0.621797  | 12.783279 | 44.743076 |
| H | 0.341029  | 13.058765 | 46.471989 |
| H | 3.417729  | 10.080286 | 41.716341 |
| H | 2.938109  | 11.713525 | 42.197864 |
| H | 6.991562  | 10.820114 | 45.065176 |
| H | 7.987247  | 12.164363 | 43.159261 |
| H | 6.371593  | 12.425239 | 41.234140 |
| H | 7.378551  | 13.992120 | 45.434383 |
| H | 6.448059  | 14.937985 | 46.608912 |
| H | 0.670500  | 8.177248  | 40.887569 |
| H | -0.659413 | 7.654848  | 40.338718 |
| H | 2.179692  | 9.315895  | 47.079882 |
| H | 3.022403  | 8.071610  | 47.547503 |
| H | 2.890984  | 11.310864 | 48.391601 |
| H | 3.098173  | 10.904451 | 49.846192 |
| C | 7.539193  | 21.950688 | 45.143428 |
| N | 8.685944  | 21.353153 | 45.790440 |
| C | 9.811265  | 21.969311 | 46.131249 |
| N | 9.972066  | 23.286009 | 46.009768 |
| N | 10.842836 | 21.226933 | 46.598612 |
| H | 6.808277  | 21.161638 | 44.962340 |
| H | 7.808262  | 22.393350 | 44.179618 |
| H | 7.065303  | 22.712156 | 45.773984 |
| H | 8.640304  | 20.366169 | 46.074606 |
| H | 9.287687  | 23.870929 | 45.528484 |
| H | 10.906080 | 23.657650 | 46.086990 |
| H | 10.593114 | 20.282666 | 46.880371 |
| H | 11.487778 | 21.702239 | 47.213223 |
| O | 9.148967  | 18.846111 | 46.867079 |
| H | 8.748590  | 18.655603 | 47.724566 |
| H | 9.137814  | 17.972242 | 46.385243 |
| O | 8.297001  | 25.088000 | 44.647000 |
| H | 8.729101  | 25.889428 | 44.321883 |
| H | 7.428298  | 25.408524 | 44.935770 |

### Cartesian coordinates of Mono-Fe1(II)-S1:

153

|    |           |           |           |
|----|-----------|-----------|-----------|
| Fe | 5.253468  | 9.366459  | 47.748880 |
| C  | 5.034534  | 6.590584  | 50.955930 |
| C  | 4.692505  | 7.765164  | 50.060133 |
| O  | 5.309905  | 7.754898  | 48.929221 |
| O  | 3.911193  | 8.667497  | 50.432878 |
| H  | 5.173067  | 5.680679  | 50.367543 |
| C  | 8.317193  | 6.489885  | 46.739588 |
| C  | 7.506872  | 6.660880  | 45.459629 |
| C  | 6.247877  | 7.529032  | 45.570353 |
| O  | 6.396785  | 8.586582  | 46.293777 |
| O  | 5.216944  | 7.203937  | 44.946928 |
| H  | 8.679154  | 7.444420  | 47.147180 |
| C  | 7.831131  | 9.910238  | 50.511765 |
| C  | 7.747583  | 10.836708 | 49.355149 |
| N  | 6.765455  | 10.789982 | 48.385340 |
| C  | 8.576063  | 11.901909 | 49.088379 |
| C  | 7.007657  | 11.815391 | 47.580451 |
| N  | 8.089616  | 12.507508 | 47.962201 |
| H  | 8.477626  | 10.363691 | 51.265000 |
| C  | 6.391465  | 8.889401  | 57.271288 |
| C  | 5.613700  | 9.336047  | 56.070942 |
| C  | 5.303084  | 10.690994 | 55.895803 |
| C  | 5.205669  | 8.443298  | 55.078481 |
| C  | 4.636763  | 11.151302 | 54.765688 |
| C  | 4.528976  | 8.883794  | 53.947963 |
| C  | 4.260775  | 10.243094 | 53.772076 |
| O  | 3.640554  | 10.721903 | 52.655050 |
| H  | 7.068570  | 9.698540  | 57.537608 |
| C  | -0.425492 | 8.619909  | 42.000777 |
| C  | 0.376598  | 7.335429  | 41.876081 |
| C  | 1.476855  | 7.077364  | 42.877149 |
| O  | 1.818139  | 8.152263  | 43.607492 |
| O  | 2.025508  | 5.992536  | 43.001667 |
| H  | -0.845305 | 8.715486  | 43.001082 |
| C  | 2.028876  | 12.907696 | 45.042055 |
| C  | 2.568903  | 12.417171 | 46.372810 |
| C  | 3.374671  | 11.125164 | 46.333743 |
| O  | 3.577471  | 10.518281 | 45.263249 |
| O  | 3.808781  | 10.737110 | 47.487332 |
| H  | 2.831130  | 13.047393 | 44.304230 |
| C  | 3.706313  | 10.754528 | 41.235181 |
| C  | 5.015006  | 10.992085 | 41.879855 |
| N  | 5.300422  | 10.770278 | 43.206578 |
| C  | 6.184821  | 11.415304 | 41.310738 |
| C  | 6.583393  | 11.038709 | 43.435134 |
| N  | 7.135126  | 11.434327 | 42.293550 |
| H  | 3.858927  | 10.924995 | 40.169709 |
| C  | 11.661904 | 13.177686 | 40.733289 |
| C  | 10.474096 | 13.133834 | 41.653224 |
| O  | 9.610082  | 12.242624 | 41.538845 |
| N  | 10.395221 | 14.125344 | 42.552524 |
| H  | 11.464496 | 13.953922 | 39.987328 |

|   |           |           |           |
|---|-----------|-----------|-----------|
| C | 13.705735 | 18.456339 | 49.625733 |
| C | 12.506394 | 17.562298 | 49.567169 |
| C | 11.830844 | 17.201431 | 48.423478 |
| C | 11.859890 | 16.856947 | 50.639753 |
| N | 10.808416 | 16.337755 | 48.717005 |
| C | 10.796825 | 16.102084 | 50.065073 |
| C | 12.065731 | 16.770969 | 52.030999 |
| C | 9.949260  | 15.296750 | 50.831537 |
| C | 11.233159 | 15.961075 | 52.791248 |
| C | 10.182305 | 15.232499 | 52.198448 |
| H | 14.589106 | 17.942519 | 49.233390 |
| C | 8.847092  | 7.635087  | 39.655381 |
| C | 7.525203  | 7.104270  | 40.126868 |
| C | 7.072862  | 7.169401  | 41.422318 |
| C | 6.471915  | 6.449588  | 39.385611 |
| N | 5.829376  | 6.611470  | 41.539390 |
| C | 5.425252  | 6.159522  | 40.312673 |
| C | 6.279243  | 6.067534  | 38.041473 |
| C | 4.234191  | 5.526074  | 39.944468 |
| C | 5.096400  | 5.435813  | 37.671534 |
| C | 4.082328  | 5.167723  | 38.611975 |
| H | 9.447039  | 8.058236  | 40.488698 |
| C | 7.010054  | 14.538853 | 45.299564 |
| C | 8.279048  | 15.279694 | 45.693302 |
| O | 8.673688  | 16.214682 | 44.930077 |
| O | 8.868287  | 14.913934 | 46.755970 |
| H | 6.495139  | 14.991929 | 44.451835 |
| H | 5.994653  | 6.802201  | 51.445759 |
| H | 4.278337  | 6.426595  | 51.726965 |
| H | 7.715960  | 6.014250  | 47.524160 |
| H | 9.188728  | 5.848979  | 46.550276 |
| H | 7.206722  | 5.685273  | 45.059607 |
| H | 8.140081  | 7.125207  | 44.688631 |
| H | 6.848116  | 9.761772  | 50.965658 |
| H | 8.228672  | 8.925307  | 50.238139 |
| H | 6.406374  | 12.083725 | 46.727089 |
| H | 8.420566  | 13.385643 | 47.517461 |
| H | 9.456609  | 12.263712 | 49.602386 |
| H | 5.747302  | 8.685859  | 58.137905 |
| H | 6.976786  | 7.985618  | 57.071026 |
| H | 5.612371  | 11.412241 | 56.653961 |
| H | 4.427795  | 12.211874 | 54.631435 |
| H | 3.630809  | 10.010223 | 51.988762 |
| H | 4.223396  | 8.176696  | 53.185745 |
| H | 5.433257  | 7.380396  | 55.176458 |
| H | 0.178892  | 9.511336  | 41.799873 |
| H | -1.256745 | 8.608668  | 41.285155 |
| H | 0.855763  | 7.269057  | 40.888018 |
| H | -0.278855 | 6.457805  | 41.934028 |
| H | 1.314755  | 12.195929 | 44.612644 |
| H | 1.514788  | 13.868511 | 45.171262 |
| H | 1.755427  | 12.265769 | 47.096035 |
| H | 3.215674  | 13.175952 | 46.837448 |
| H | 3.371998  | 9.721854  | 41.374379 |
| H | 2.922477  | 11.423692 | 41.608414 |
| H | 4.617330  | 10.550957 | 43.966088 |
| H | 7.095814  | 10.924472 | 44.376973 |

|   |           |           |           |
|---|-----------|-----------|-----------|
| H | 8.113890  | 11.752137 | 42.155861 |
| H | 6.407891  | 11.689110 | 40.288525 |
| H | 12.584846 | 13.434930 | 41.264395 |
| H | 11.773087 | 12.212713 | 40.235230 |
| H | 11.117331 | 14.827245 | 42.610444 |
| H | 9.595132  | 14.229290 | 43.158684 |
| H | 13.566249 | 19.364908 | 49.026170 |
| H | 13.930630 | 18.771649 | 50.649128 |
| H | 12.014163 | 17.495024 | 47.396174 |
| H | 10.202016 | 15.901601 | 48.029214 |
| H | 9.130611  | 14.744964 | 50.374480 |
| H | 9.540924  | 14.608656 | 52.819723 |
| H | 11.390742 | 15.888930 | 53.866870 |
| H | 12.868604 | 17.328580 | 52.513380 |
| H | 9.453383  | 6.850231  | 39.181932 |
| H | 8.720656  | 8.426299  | 38.902688 |
| H | 7.565063  | 7.588731  | 42.289131 |
| H | 5.314686  | 6.544723  | 42.405380 |
| H | 3.457187  | 5.319316  | 40.678467 |
| H | 3.165002  | 4.671733  | 38.294280 |
| H | 4.945026  | 5.141029  | 36.633100 |
| H | 7.044289  | 6.261820  | 37.289399 |
| H | 7.266260  | 13.510199 | 45.031051 |
| H | 6.325887  | 14.500325 | 46.152814 |
| H | 2.551682  | 7.877748  | 44.190625 |
| C | 7.384571  | 21.284734 | 44.312945 |
| N | 8.536346  | 20.837128 | 45.066365 |
| C | 9.636703  | 21.528108 | 45.333777 |
| N | 9.861715  | 22.750171 | 44.833965 |
| N | 10.567991 | 20.974050 | 46.136398 |
| H | 6.720405  | 20.422489 | 44.174073 |
| H | 6.827299  | 22.063869 | 44.847295 |
| H | 7.670545  | 21.657415 | 43.322739 |
| H | 8.540277  | 19.881398 | 45.450141 |
| H | 10.593307 | 23.287582 | 45.277114 |
| H | 9.081802  | 23.310621 | 44.509971 |
| H | 11.504721 | 21.345053 | 46.087121 |
| H | 10.484747 | 19.972445 | 46.282286 |
| O | 9.200601  | 18.411350 | 46.228816 |
| H | 9.067740  | 17.536107 | 45.746099 |
| H | 8.865869  | 18.242456 | 47.118672 |
| O | 8.049000  | 24.956000 | 44.152000 |
| H | 8.426561  | 25.844223 | 44.229130 |
| H | 7.164705  | 25.125333 | 43.802624 |

### Cartesian coordinates of Mono-Fe1(II)-S2:

153

|    |          |          |           |
|----|----------|----------|-----------|
| Fe | 5.089052 | 9.535556 | 48.025480 |
| C  | 5.407975 | 6.633522 | 50.844684 |
| C  | 4.973449 | 7.766908 | 49.954853 |
| O  | 5.381341 | 7.692429 | 48.732009 |
| O  | 4.306330 | 8.748718 | 50.362024 |

|   |           |           |           |
|---|-----------|-----------|-----------|
| H | 5.173067  | 5.680679  | 50.367543 |
| C | 8.255595  | 6.511006  | 46.750203 |
| C | 7.440573  | 6.715580  | 45.480228 |
| C | 6.279749  | 7.662046  | 45.613237 |
| O | 6.324607  | 8.716029  | 46.239975 |
| O | 5.208436  | 7.253305  | 44.928535 |
| H | 8.679154  | 7.444420  | 47.147180 |
| C | 7.720965  | 9.994917  | 50.577877 |
| C | 7.676990  | 10.891617 | 49.398952 |
| N | 6.693944  | 10.841886 | 48.430473 |
| C | 8.539346  | 11.914357 | 49.086969 |
| C | 6.969344  | 11.822079 | 47.579665 |
| N | 8.072052  | 12.490126 | 47.936589 |
| H | 8.477626  | 10.363691 | 51.265000 |
| C | 6.401412  | 8.888266  | 57.266507 |
| C | 5.638960  | 9.324468  | 56.053305 |
| C | 5.275736  | 10.668573 | 55.890281 |
| C | 5.294197  | 8.430432  | 55.038696 |
| C | 4.613555  | 11.116443 | 54.752818 |
| C | 4.619150  | 8.858906  | 53.902567 |
| C | 4.293782  | 10.206671 | 53.742036 |
| O | 3.670592  | 10.669285 | 52.619798 |
| H | 7.068570  | 9.698540  | 57.537608 |
| C | -0.196552 | 8.795963  | 42.128504 |
| C | 0.699567  | 7.577327  | 41.955289 |
| C | 1.888439  | 7.374626  | 42.927862 |
| O | 2.183863  | 8.292320  | 43.740308 |
| O | 2.500891  | 6.271513  | 42.789114 |
| H | -0.845306 | 8.715486  | 43.001082 |
| C | 2.018229  | 12.843917 | 45.016250 |
| C | 2.530406  | 12.482255 | 46.399234 |
| C | 3.413267  | 11.250704 | 46.507524 |
| O | 3.894603  | 10.675544 | 45.513679 |
| O | 3.649616  | 10.865808 | 47.725428 |
| H | 2.831129  | 13.047393 | 44.304231 |
| C | 3.734155  | 10.614328 | 41.203726 |
| C | 5.038517  | 10.865513 | 41.843740 |
| N | 5.292815  | 10.777902 | 43.190850 |
| C | 6.231138  | 11.193496 | 41.257904 |
| C | 6.578186  | 11.036957 | 43.419399 |
| N | 7.162883  | 11.283759 | 42.253730 |
| H | 3.858926  | 10.924995 | 40.169709 |
| C | 11.589741 | 13.220616 | 40.790393 |
| C | 10.475072 | 13.445710 | 41.775720 |
| O | 9.457480  | 12.731453 | 41.780228 |
| N | 10.629280 | 14.485513 | 42.608999 |
| H | 11.464495 | 13.953923 | 39.987328 |
| C | 13.667219 | 18.451050 | 49.528098 |
| C | 12.487368 | 17.535559 | 49.427024 |
| C | 11.853574 | 17.160636 | 48.262736 |
| C | 11.808527 | 16.834473 | 50.482817 |
| N | 10.829372 | 16.291761 | 48.528551 |
| C | 10.769624 | 16.071199 | 49.877398 |
| C | 11.960717 | 16.761350 | 51.881802 |
| C | 9.885610  | 15.283112 | 50.619444 |
| C | 11.094778 | 15.963448 | 52.618364 |
| C | 10.063817 | 15.234134 | 51.994714 |

|   |           |           |           |
|---|-----------|-----------|-----------|
| H | 14.589104 | 17.942522 | 49.233390 |
| C | 8.795514  | 7.639895  | 39.684183 |
| C | 7.453541  | 7.129820  | 40.138681 |
| C | 6.886477  | 7.289332  | 41.383550 |
| C | 6.467303  | 6.408869  | 39.363319 |
| N | 5.638426  | 6.726214  | 41.433584 |
| C | 5.346619  | 6.179746  | 40.214202 |
| C | 6.390145  | 5.918316  | 38.042187 |
| C | 4.190521  | 5.507533  | 39.804170 |
| C | 5.245897  | 5.243600  | 37.628854 |
| C | 4.155391  | 5.040395  | 38.498315 |
| H | 9.447038  | 8.058237  | 40.488698 |
| C | 7.041843  | 14.479249 | 45.241186 |
| C | 8.343442  | 15.171020 | 45.611091 |
| O | 8.779481  | 16.077137 | 44.836935 |
| O | 8.926069  | 14.793425 | 46.673045 |
| H | 6.495139  | 14.991927 | 44.451834 |
| H | 6.499282  | 6.672459  | 50.947481 |
| H | 4.952532  | 6.670477  | 51.832701 |
| H | 7.643091  | 6.063830  | 47.538995 |
| H | 9.083288  | 5.826040  | 46.532641 |
| H | 7.066349  | 5.762536  | 45.092917 |
| H | 8.077590  | 7.139802  | 44.689737 |
| H | 6.763163  | 9.992381  | 51.106508 |
| H | 7.966166  | 8.961478  | 50.308372 |
| H | 6.379417  | 12.069545 | 46.712245 |
| H | 8.433194  | 13.341618 | 47.455251 |
| H | 9.434266  | 12.263684 | 49.583273 |
| H | 5.746379  | 8.691903  | 58.126068 |
| H | 6.992498  | 7.985712  | 57.080919 |
| H | 5.537133  | 11.392387 | 56.663782 |
| H | 4.360308  | 12.168609 | 54.628316 |
| H | 3.718522  | 9.967828  | 51.946927 |
| H | 4.351101  | 8.153485  | 53.124652 |
| H | 5.567862  | 7.377903  | 55.126991 |
| H | 0.389035  | 9.716024  | 42.235015 |
| H | -0.856583 | 8.914611  | 41.255858 |
| H | 1.143943  | 7.589226  | 40.948689 |
| H | 0.100252  | 6.656771  | 41.983210 |
| H | 1.403577  | 12.040713 | 44.593538 |
| H | 1.398254  | 13.747352 | 45.075407 |
| H | 1.696926  | 12.341630 | 47.100491 |
| H | 3.117190  | 13.311120 | 46.826123 |
| H | 3.470772  | 9.553124  | 41.230716 |
| H | 2.921466  | 11.180451 | 41.668572 |
| H | 4.604299  | 10.661168 | 43.960628 |
| H | 7.068766  | 11.026228 | 44.378193 |
| H | 8.116441  | 11.644208 | 42.140130 |
| H | 6.479250  | 11.356182 | 40.218462 |
| H | 12.576725 | 13.378113 | 41.237798 |
| H | 11.519402 | 12.211631 | 40.379688 |
| H | 11.452550 | 15.065152 | 42.559972 |
| H | 9.888682  | 14.774866 | 43.234498 |
| H | 13.557167 | 19.326636 | 48.876139 |
| H | 13.807763 | 18.817919 | 50.549730 |
| H | 12.069106 | 17.445321 | 47.238440 |
| H | 10.237735 | 15.853740 | 47.828251 |

|   |           |           |           |
|---|-----------|-----------|-----------|
| H | 9.077632  | 14.737406 | 50.138046 |
| H | 9.391053  | 14.624384 | 52.596544 |
| H | 11.210446 | 15.901652 | 53.699796 |
| H | 12.746924 | 17.321862 | 52.387467 |
| H | 9.372335  | 6.842656  | 39.195711 |
| H | 8.676680  | 8.433124  | 38.930969 |
| H | 7.296885  | 7.781286  | 42.255861 |
| H | 5.001585  | 6.730074  | 42.220837 |
| H | 3.357582  | 5.372071  | 40.493430 |
| H | 3.271317  | 4.509608  | 38.144780 |
| H | 5.185299  | 4.862820  | 36.609198 |
| H | 7.214055  | 6.060600  | 37.342881 |
| H | 7.272157  | 13.470621 | 44.886880 |
| H | 6.399722  | 14.393189 | 46.122011 |
| H | 4.484582  | 7.910097  | 44.999611 |
| C | 7.377721  | 21.278816 | 44.340802 |
| N | 8.506275  | 20.792891 | 45.100207 |
| C | 9.616205  | 21.454007 | 45.401528 |
| N | 9.852403  | 22.696460 | 44.954706 |
| N | 10.541858 | 20.838823 | 46.150589 |
| H | 6.720405  | 20.422489 | 44.174073 |
| H | 6.813848  | 22.043380 | 44.889367 |
| H | 7.681081  | 21.678031 | 43.366330 |
| H | 8.486706  | 19.820496 | 45.441133 |
| H | 10.602967 | 23.205512 | 45.399637 |
| H | 9.076085  | 23.277863 | 44.665187 |
| H | 11.441590 | 21.264985 | 46.298673 |
| H | 10.420678 | 19.852303 | 46.344933 |
| O | 9.012048  | 18.326371 | 46.190923 |
| H | 8.982072  | 17.462630 | 45.685254 |
| H | 8.553481  | 18.132775 | 47.017610 |
| O | 8.049000  | 24.956000 | 44.152000 |
| H | 8.413068  | 25.837218 | 43.991621 |
| H | 7.100881  | 25.081798 | 44.009037 |

### Cartesian coordinates of Mono-Fe1(II)-S3:

153

|    |          |           |           |
|----|----------|-----------|-----------|
| Fe | 5.251818 | 9.446474  | 47.777195 |
| C  | 5.185228 | 6.598494  | 50.965758 |
| C  | 4.697604 | 7.782140  | 50.149583 |
| O  | 5.275467 | 7.880508  | 48.997149 |
| O  | 3.841708 | 8.573089  | 50.589268 |
| H  | 5.173067 | 5.680679  | 50.367543 |
| C  | 8.184693 | 6.513899  | 46.830941 |
| C  | 7.434545 | 6.662861  | 45.515760 |
| C  | 6.410613 | 7.796028  | 45.410753 |
| O  | 6.439311 | 8.682415  | 46.329782 |
| O  | 5.663715 | 7.821143  | 44.399397 |
| H  | 8.679154 | 7.444420  | 47.147180 |
| C  | 7.798389 | 9.943761  | 50.528963 |
| C  | 7.770978 | 10.858729 | 49.363571 |
| N  | 6.819898 | 10.805651 | 48.369093 |



|   |           |           |           |
|---|-----------|-----------|-----------|
| C | 8.625927  | 11.903339 | 49.098554 |
| C | 7.103285  | 11.800738 | 47.542177 |
| N | 8.183939  | 12.485938 | 47.941969 |
| H | 8.477626  | 10.363691 | 51.265000 |
| C | 6.402915  | 8.889752  | 57.253620 |
| C | 5.608955  | 9.364757  | 56.076044 |
| C | 5.318675  | 10.726893 | 55.925419 |
| C | 5.160102  | 8.490688  | 55.084951 |
| C | 4.623130  | 11.212198 | 54.823106 |
| C | 4.454672  | 8.955669  | 53.982428 |
| C | 4.197663  | 10.320513 | 53.835434 |
| O | 3.539988  | 10.818540 | 52.746667 |
| H | 7.068570  | 9.698540  | 57.537608 |
| C | -0.536552 | 8.643794  | 41.960771 |
| C | 0.679883  | 7.738689  | 41.911231 |
| C | 1.696225  | 7.992866  | 43.002475 |
| O | 1.444002  | 9.120165  | 43.671157 |
| O | 2.639729  | 7.249155  | 43.228743 |
| H | -0.845305 | 8.715486  | 43.001082 |
| C | 1.984341  | 12.775120 | 44.954674 |
| C | 2.419423  | 12.298665 | 46.332336 |
| C | 3.171882  | 10.974671 | 46.440490 |
| O | 3.026393  | 10.036622 | 45.634230 |
| O | 3.941297  | 10.903225 | 47.479283 |
| H | 2.831130  | 13.047393 | 44.304230 |
| C | 3.845554  | 10.413059 | 41.133430 |
| C | 5.112431  | 10.749782 | 41.820379 |
| N | 5.596013  | 10.183270 | 42.980588 |
| C | 6.051181  | 11.670487 | 41.440965 |
| C | 6.776207  | 10.721171 | 43.277883 |
| N | 7.061747  | 11.632724 | 42.359298 |
| H | 3.858927  | 10.924995 | 40.169709 |
| C | 11.548255 | 13.150606 | 40.719625 |
| C | 10.427197 | 13.366888 | 41.692003 |
| O | 9.377985  | 12.702499 | 41.605286 |
| N | 10.601671 | 14.338127 | 42.597358 |
| H | 11.464496 | 13.953922 | 39.987328 |
| C | 13.693579 | 18.494508 | 49.528389 |
| C | 12.490824 | 17.607273 | 49.472570 |
| C | 11.812433 | 17.240625 | 48.332620 |
| C | 11.849503 | 16.904878 | 50.550050 |
| N | 10.791429 | 16.378314 | 48.633893 |
| C | 10.785074 | 16.148711 | 49.982649 |
| C | 12.065606 | 16.819499 | 51.939878 |
| C | 9.940515  | 15.345735 | 50.754776 |
| C | 11.239768 | 16.007615 | 52.705257 |
| C | 10.184039 | 15.279824 | 52.119403 |
| H | 14.589106 | 17.942519 | 49.233390 |
| C | 8.887504  | 7.589298  | 39.650013 |
| C | 7.559386  | 7.060280  | 40.101294 |
| C | 7.104789  | 7.121648  | 41.394526 |
| C | 6.501221  | 6.420807  | 39.353243 |
| N | 5.857728  | 6.574334  | 41.507574 |
| C | 5.447425  | 6.142474  | 40.276980 |
| C | 6.309572  | 6.042101  | 38.008493 |
| C | 4.246062  | 5.534401  | 39.900809 |
| C | 5.119468  | 5.427485  | 37.632526 |

|   |           |           |           |
|---|-----------|-----------|-----------|
| C | 4.094936  | 5.178977  | 38.566950 |
| H | 9.447039  | 8.058236  | 40.488698 |
| C | 7.022734  | 14.509987 | 45.273956 |
| C | 8.282358  | 15.266192 | 45.662567 |
| O | 8.628915  | 16.231852 | 44.912470 |
| O | 8.911085  | 14.892349 | 46.697498 |
| H | 6.495139  | 14.991929 | 44.451835 |
| H | 6.234699  | 6.771096  | 51.237870 |
| H | 4.599896  | 6.457314  | 51.877010 |
| H | 7.510219  | 6.222689  | 47.642438 |
| H | 8.953676  | 5.734826  | 46.736513 |
| H | 6.912974  | 5.732788  | 45.256798 |
| H | 8.144758  | 6.825678  | 44.692402 |
| H | 6.811527  | 9.864827  | 50.991027 |
| H | 8.130794  | 8.933521  | 50.265622 |
| H | 6.538630  | 12.047189 | 46.657585 |
| H | 8.527781  | 13.352486 | 47.488935 |
| H | 9.495487  | 12.264371 | 49.631633 |
| H | 5.770356  | 8.652043  | 58.119893 |
| H | 6.999455  | 8.000969  | 57.021519 |
| H | 5.664641  | 11.433620 | 56.680760 |
| H | 4.427047  | 12.277330 | 54.708575 |
| H | 3.486707  | 10.105416 | 52.087145 |
| H | 4.116572  | 8.267347  | 53.215651 |
| H | 5.376798  | 7.424015  | 55.164185 |
| H | -0.307339 | 9.659858  | 41.619893 |
| H | -1.357149 | 8.253991  | 41.348538 |
| H | 1.214630  | 7.812033  | 40.954027 |
| H | 0.394348  | 6.683227  | 42.005915 |
| H | 1.390077  | 12.021713 | 44.429529 |
| H | 1.363022  | 13.674029 | 45.061087 |
| H | 1.529217  | 12.168096 | 46.967971 |
| H | 3.022259  | 13.062286 | 46.837660 |
| H | 3.754440  | 9.338670  | 40.951215 |
| H | 2.970237  | 10.747791 | 41.698582 |
| H | 5.267478  | 9.359846  | 43.527950 |
| H | 7.398904  | 10.444492 | 44.114393 |
| H | 7.952808  | 12.152989 | 42.270763 |
| H | 6.075079  | 12.334465 | 40.588546 |
| H | 12.535021 | 13.216687 | 41.187628 |
| H | 11.424038 | 12.187359 | 40.220975 |
| H | 11.450268 | 14.882783 | 42.614156 |
| H | 9.848891  | 14.618552 | 43.207230 |
| H | 13.600201 | 19.350613 | 48.848972 |
| H | 13.865775 | 18.889200 | 50.534729 |
| H | 11.994085 | 17.527778 | 47.303368 |
| H | 10.186104 | 15.934640 | 47.949546 |
| H | 9.119106  | 14.794293 | 50.302187 |
| H | 9.547171  | 14.655371 | 52.744116 |
| H | 11.407993 | 15.930275 | 53.778737 |
| H | 12.873430 | 17.376939 | 52.413755 |
| H | 9.524777  | 6.797159  | 39.230852 |
| H | 8.775318  | 8.348235  | 38.862968 |
| H | 7.597781  | 7.527899  | 42.265441 |
| H | 5.316462  | 6.584260  | 42.360827 |
| H | 3.460015  | 5.345819  | 40.631362 |
| H | 3.170331  | 4.701434  | 38.242277 |

|   |           |           |           |
|---|-----------|-----------|-----------|
| H | 4.971561  | 5.131771  | 36.593808 |
| H | 7.082971  | 6.222116  | 37.261125 |
| H | 7.287872  | 13.493365 | 44.968094 |
| H | 6.353701  | 14.435665 | 46.136944 |
| H | 2.121486  | 9.311001  | 44.375177 |
| C | 7.397552  | 21.276948 | 44.266470 |
| N | 8.566454  | 20.826144 | 44.986763 |
| C | 9.650367  | 21.535687 | 45.264084 |
| N | 9.853507  | 22.765014 | 44.771693 |
| N | 10.588486 | 20.996060 | 46.071693 |
| H | 6.720405  | 20.422489 | 44.174073 |
| H | 6.869830  | 22.073155 | 44.804818 |
| H | 7.650234  | 21.623502 | 43.257717 |
| H | 8.583851  | 19.865492 | 45.366181 |
| H | 10.559670 | 23.319312 | 45.235256 |
| H | 9.066912  | 23.311712 | 44.432197 |
| H | 11.526497 | 21.356101 | 45.990117 |
| H | 10.510588 | 19.993594 | 46.217391 |
| O | 9.202058  | 18.419554 | 46.163395 |
| H | 9.036346  | 17.538924 | 45.699929 |
| H | 8.825419  | 18.294443 | 47.041543 |
| O | 8.049000  | 24.956000 | 44.152000 |
| H | 8.432506  | 25.707941 | 43.681431 |
| H | 7.110766  | 25.012161 | 43.926675 |

### Cartesian coordinates of Mono-Fe1(II)-S4:

153

|    |          |           |           |
|----|----------|-----------|-----------|
| Fe | 5.295908 | 9.526105  | 48.049122 |
| C  | 5.143433 | 6.598652  | 50.967576 |
| C  | 4.794475 | 7.795339  | 50.112707 |
| O  | 5.324369 | 7.771260  | 48.932405 |
| O  | 4.114228 | 8.756942  | 50.523354 |
| H  | 5.173067 | 5.680679  | 50.367543 |
| C  | 8.143912 | 6.572724  | 46.737562 |
| C  | 7.290843 | 6.907049  | 45.519799 |
| C  | 6.231072 | 7.994809  | 45.677022 |
| O  | 6.483770 | 8.905815  | 46.548501 |
| O  | 5.230501 | 7.996606  | 44.919401 |
| H  | 8.679154 | 7.444420  | 47.147180 |
| C  | 7.760373 | 9.989468  | 50.542993 |
| C  | 7.704570 | 10.958441 | 49.425497 |
| N  | 6.654359 | 11.017961 | 48.536953 |
| C  | 8.606591 | 11.942237 | 49.095952 |
| C  | 6.928230 | 12.015236 | 47.704851 |
| N  | 8.093618 | 12.596528 | 48.007463 |
| H  | 8.477626 | 10.363691 | 51.265000 |
| C  | 6.455018 | 8.857824  | 57.234488 |
| C  | 5.645013 | 9.319708  | 56.063568 |
| C  | 5.341697 | 10.679562 | 55.914904 |
| C  | 5.195020 | 8.438471  | 55.079290 |
| C  | 4.638459 | 11.157681 | 54.813959 |
| C  | 4.480472 | 8.896288  | 53.979677 |

|   |           |           |           |
|---|-----------|-----------|-----------|
| C | 4.219714  | 10.260954 | 53.828884 |
| O | 3.563965  | 10.752048 | 52.735264 |
| H | 7.068570  | 9.698540  | 57.537608 |
| C | -0.352328 | 8.764904  | 42.027254 |
| C | 0.543773  | 7.557781  | 41.808001 |
| C | 1.739965  | 7.385635  | 42.773415 |
| O | 1.964841  | 8.295212  | 43.618103 |
| O | 2.408544  | 6.318298  | 42.616208 |
| H | -0.845306 | 8.715486  | 43.001082 |
| C | 2.048931  | 13.016178 | 45.076842 |
| C | 2.586458  | 12.582733 | 46.430834 |
| C | 3.220139  | 11.225837 | 46.516107 |
| O | 3.174980  | 10.521222 | 45.410216 |
| O | 3.743854  | 10.824632 | 47.571669 |
| H | 2.831129  | 13.047393 | 44.304231 |
| C | 3.818781  | 10.387040 | 41.117101 |
| C | 5.092730  | 10.687200 | 41.799133 |
| N | 5.527371  | 10.138021 | 42.984828 |
| C | 6.089947  | 11.537636 | 41.406186 |
| C | 6.730505  | 10.619745 | 43.296342 |
| N | 7.080455  | 11.476223 | 42.346357 |
| H | 3.858926  | 10.924995 | 40.169709 |
| C | 11.554753 | 13.159716 | 40.739292 |
| C | 10.409676 | 13.327639 | 41.698007 |
| O | 9.398614  | 12.604484 | 41.615248 |
| N | 10.528118 | 14.312293 | 42.598942 |
| H | 11.464495 | 13.953923 | 39.987328 |
| C | 13.676852 | 18.484423 | 49.500405 |
| C | 12.491387 | 17.573680 | 49.451049 |
| C | 11.811197 | 17.200893 | 48.314610 |
| C | 11.861355 | 16.866893 | 50.532922 |
| N | 10.796642 | 16.332597 | 48.621352 |
| C | 10.797111 | 16.103555 | 49.970960 |
| C | 12.080966 | 16.787962 | 51.921978 |
| C | 9.953654  | 15.305824 | 50.750251 |
| C | 11.254769 | 15.981186 | 52.695847 |
| C | 10.197892 | 15.249308 | 52.116031 |
| H | 14.589104 | 17.942522 | 49.233390 |
| C | 8.869980  | 7.573222  | 39.669989 |
| C | 7.522667  | 7.047766  | 40.085430 |
| C | 6.990309  | 7.082367  | 41.353832 |
| C | 6.505858  | 6.427098  | 39.262524 |
| N | 5.730955  | 6.542108  | 41.375890 |
| C | 5.395946  | 6.141700  | 40.110539 |
| C | 6.395290  | 6.068967  | 37.901995 |
| C | 4.208763  | 5.560048  | 39.653848 |
| C | 5.223833  | 5.473253  | 37.444256 |
| C | 4.137220  | 5.228505  | 38.307965 |
| H | 9.447038  | 8.058237  | 40.488698 |
| C | 7.015597  | 14.521405 | 45.285831 |
| C | 8.323951  | 15.218761 | 45.625766 |
| O | 8.745653  | 16.109021 | 44.825733 |
| O | 8.918244  | 14.869422 | 46.691656 |
| H | 6.495139  | 14.991927 | 44.451834 |
| H | 6.164379  | 6.752789  | 51.346885 |
| H | 4.467425  | 6.480000  | 51.818979 |
| H | 7.531705  | 6.159650  | 47.545697 |

|   |           |           |           |
|---|-----------|-----------|-----------|
| H | 8.891067  | 5.816769  | 46.464815 |
| H | 6.786803  | 6.011588  | 45.136780 |
| H | 7.941936  | 7.249316  | 44.700030 |
| H | 6.790699  | 9.910295  | 51.042632 |
| H | 8.066152  | 8.986520  | 50.220982 |
| H | 6.305224  | 12.327287 | 46.883240 |
| H | 8.465116  | 13.440772 | 47.520312 |
| H | 9.553239  | 12.218177 | 49.543303 |
| H | 5.832617  | 8.562794  | 58.090195 |
| H | 7.104572  | 8.011894  | 56.985087 |
| H | 5.686410  | 11.390311 | 56.667860 |
| H | 4.435099  | 12.222026 | 54.697001 |
| H | 3.568084  | 10.052097 | 52.057473 |
| H | 4.138239  | 8.201928  | 53.221026 |
| H | 5.417559  | 7.373022  | 55.160380 |
| H | 0.219571  | 9.700005  | 42.003606 |
| H | -1.139789 | 8.824599  | 41.261206 |
| H | 0.959512  | 7.568977  | 40.789831 |
| H | -0.049908 | 6.633946  | 41.861570 |
| H | 1.260349  | 12.342466 | 44.725334 |
| H | 1.622486  | 14.022334 | 45.164164 |
| H | 1.788880  | 12.574690 | 47.188292 |
| H | 3.329834  | 13.290876 | 46.823912 |
| H | 3.704186  | 9.318383  | 40.916339 |
| H | 2.951314  | 10.716839 | 41.697424 |
| H | 5.075438  | 9.409455  | 43.545409 |
| H | 7.316310  | 10.353836 | 44.163517 |
| H | 7.985283  | 11.974458 | 42.267264 |
| H | 6.170743  | 12.163644 | 40.527821 |
| H | 12.526372 | 13.264663 | 41.233496 |
| H | 11.484254 | 12.185756 | 40.251034 |
| H | 11.352997 | 14.891999 | 42.617593 |
| H | 9.760665  | 14.572969 | 43.202885 |
| H | 13.576643 | 19.319192 | 48.795618 |
| H | 13.825566 | 18.909659 | 50.498530 |
| H | 11.984833 | 17.490002 | 47.283882 |
| H | 10.194685 | 15.884456 | 47.938562 |
| H | 9.129866  | 14.753389 | 50.304308 |
| H | 9.558960  | 14.632082 | 52.746086 |
| H | 11.422791 | 15.914503 | 53.770382 |
| H | 12.888714 | 17.350027 | 52.390999 |
| H | 9.502731  | 6.773125  | 39.260773 |
| H | 8.766488  | 8.320162  | 38.869879 |
| H | 7.438851  | 7.456927  | 42.264752 |
| H | 5.102896  | 6.512954  | 42.168686 |
| H | 3.376297  | 5.393441  | 40.336715 |
| H | 3.227737  | 4.769378  | 37.918935 |
| H | 5.138565  | 5.188431  | 36.395496 |
| H | 7.215422  | 6.247421  | 37.206233 |
| H | 7.220241  | 13.476141 | 45.019806 |
| H | 6.357346  | 14.527753 | 46.160982 |
| H | 3.568243  | 9.633989  | 45.547143 |
| C | 7.393695  | 21.274940 | 44.285004 |
| N | 8.545641  | 20.813377 | 45.026375 |
| C | 9.646439  | 21.500621 | 45.299864 |
| N | 9.866972  | 22.727168 | 44.813649 |
| N | 10.579407 | 20.937698 | 46.097083 |

|   |           |           |           |
|---|-----------|-----------|-----------|
| H | 6.720405  | 20.422489 | 44.174073 |
| H | 6.857311  | 22.067424 | 44.820199 |
| H | 7.669626  | 21.629521 | 43.285573 |
| H | 8.548869  | 19.849150 | 45.383997 |
| H | 10.592948 | 23.266356 | 45.259726 |
| H | 9.089014  | 23.281462 | 44.477471 |
| H | 11.523204 | 21.293815 | 46.023219 |
| H | 10.494438 | 19.934343 | 46.232556 |
| O | 9.171527  | 18.359983 | 46.136980 |
| H | 9.074569  | 17.490170 | 45.650864 |
| H | 8.787707  | 18.187314 | 47.010850 |
| O | 8.049000  | 24.956000 | 44.152000 |
| H | 8.417422  | 25.817112 | 43.914431 |
| H | 7.097437  | 25.081784 | 44.026839 |

### Cartesian coordinates of Mono-Fe2(II)-S1:

153

|    |           |           |           |
|----|-----------|-----------|-----------|
| Fe | 3.963175  | 8.974976  | 44.463616 |
| C  | 5.418527  | 6.709823  | 50.659592 |
| C  | 4.420590  | 7.687128  | 50.097884 |
| O  | 4.652225  | 7.946229  | 48.806837 |
| O  | 3.509571  | 8.208268  | 50.731549 |
| H  | 5.173067  | 5.680679  | 50.367543 |
| C  | 8.184331  | 6.487394  | 46.931896 |
| C  | 7.301533  | 6.555654  | 45.695594 |
| C  | 6.296776  | 7.697441  | 45.655706 |
| O  | 6.525262  | 8.767044  | 46.255417 |
| O  | 5.261340  | 7.493113  | 44.911904 |
| H  | 8.679154  | 7.444420  | 47.147180 |
| C  | 7.820003  | 9.948064  | 50.501498 |
| C  | 7.784253  | 10.890841 | 49.360323 |
| N  | 7.398600  | 10.571098 | 48.080306 |
| C  | 8.107096  | 12.220953 | 49.323455 |
| C  | 7.488666  | 11.651466 | 47.310907 |
| N  | 7.915390  | 12.669428 | 48.044744 |
| H  | 8.477626  | 10.363692 | 51.265001 |
| C  | 6.555180  | 8.822580  | 57.150933 |
| C  | 5.708258  | 9.271694  | 56.000346 |
| C  | 5.439149  | 10.632549 | 55.811520 |
| C  | 5.165868  | 8.368944  | 55.082356 |
| C  | 4.677001  | 11.089160 | 54.741256 |
| C  | 4.389159  | 8.803946  | 54.016245 |
| C  | 4.155002  | 10.169618 | 53.829679 |
| O  | 3.425247  | 10.648718 | 52.778199 |
| H  | 7.068568  | 9.698540  | 57.537609 |
| C  | -0.254882 | 8.664594  | 42.083833 |
| C  | 0.657009  | 7.445646  | 42.037714 |
| C  | 1.945649  | 7.443140  | 42.868311 |
| O  | 2.207682  | 8.507244  | 43.540042 |
| O  | 2.673718  | 6.428272  | 42.808914 |
| H  | -0.845304 | 8.715486  | 43.001080 |

|   |           |           |           |
|---|-----------|-----------|-----------|
| C | 2.199794  | 13.175028 | 45.200052 |
| C | 2.812586  | 12.608699 | 46.477270 |
| C | 3.117606  | 11.106531 | 46.509608 |
| O | 3.152566  | 10.546176 | 45.356989 |
| O | 3.316894  | 10.548632 | 47.609451 |
| H | 2.831130  | 13.047393 | 44.304230 |
| C | 3.676418  | 10.492427 | 41.152266 |
| C | 4.939485  | 10.658844 | 41.905818 |
| N | 5.219463  | 10.100240 | 43.135309 |
| C | 6.033340  | 11.372808 | 41.487493 |
| C | 6.457508  | 10.473875 | 43.435976 |
| N | 6.976905  | 11.239381 | 42.465851 |
| H | 3.858928  | 10.924995 | 40.169708 |
| C | 11.503197 | 13.139853 | 40.722710 |
| C | 10.391970 | 13.379751 | 41.710668 |
| O | 9.313483  | 12.768146 | 41.649385 |
| N | 10.627496 | 14.332846 | 42.630396 |
| H | 11.464496 | 13.953923 | 39.987329 |
| C | 13.701920 | 18.544559 | 49.440815 |
| C | 12.491203 | 17.671499 | 49.418907 |
| C | 11.789001 | 17.296997 | 48.297054 |
| C | 11.883570 | 16.971290 | 50.516259 |
| N | 10.778278 | 16.432770 | 48.629368 |
| C | 10.803615 | 16.215610 | 49.980110 |
| C | 12.135660 | 16.885790 | 51.899282 |
| C | 9.965533  | 15.434709 | 50.777285 |
| C | 11.319690 | 16.086108 | 52.688124 |
| C | 10.238266 | 15.372060 | 52.135707 |
| H | 14.589104 | 17.942521 | 49.233391 |
| C | 8.881667  | 7.623106  | 39.636384 |
| C | 7.537678  | 7.070747  | 40.021874 |
| C | 6.978117  | 7.110214  | 41.277435 |
| C | 6.550962  | 6.424225  | 39.184602 |
| N | 5.735378  | 6.537772  | 41.281662 |
| C | 5.432856  | 6.115466  | 40.016585 |
| C | 6.467453  | 6.068904  | 37.822086 |
| C | 4.274558  | 5.492932  | 39.540576 |
| C | 5.318239  | 5.446620  | 37.344353 |
| C | 4.230120  | 5.162477  | 38.193507 |
| H | 9.447040  | 8.058237  | 40.488699 |
| C | 7.018922  | 14.433873 | 45.226317 |
| C | 8.179614  | 15.232406 | 45.787190 |
| O | 8.718672  | 16.090871 | 45.031056 |
| O | 8.558734  | 14.995765 | 46.983289 |
| H | 6.495139  | 14.991929 | 44.451835 |
| H | 6.416075  | 6.914869  | 50.263717 |
| H | 5.426902  | 6.767622  | 51.748096 |
| H | 7.600869  | 6.211990  | 47.818017 |
| H | 8.963560  | 5.726671  | 46.798997 |
| H | 6.765554  | 5.612713  | 45.536595 |
| H | 7.925573  | 6.692033  | 44.798777 |
| H | 6.827509  | 9.813362  | 50.947180 |
| H | 8.206202  | 8.967544  | 50.207791 |
| H | 7.089832  | 9.672700  | 47.671645 |
| H | 7.253116  | 11.676661 | 46.261357 |
| H | 8.121859  | 13.643692 | 47.643339 |
| H | 8.456961  | 12.858796 | 50.119564 |

|   |           |           |           |
|---|-----------|-----------|-----------|
| H | 5.956389  | 8.388225  | 57.963423 |
| H | 7.298449  | 8.072773  | 56.854720 |
| H | 5.846744  | 11.361152 | 56.514095 |
| H | 4.490540  | 12.153067 | 54.600534 |
| H | 3.264656  | 9.912239  | 52.167053 |
| H | 3.967638  | 8.086089  | 53.319360 |
| H | 5.355598  | 7.300187  | 55.195024 |
| H | 0.314179  | 9.596681  | 42.003616 |
| H | -0.968651 | 8.633530  | 41.249532 |
| H | 0.990828  | 7.272386  | 41.004306 |
| H | 0.102815  | 6.536311  | 42.308719 |
| H | 1.237961  | 12.695506 | 44.981573 |
| H | 2.010863  | 14.250049 | 45.323905 |
| H | 2.171255  | 12.829462 | 47.340653 |
| H | 3.765980  | 13.112424 | 46.696175 |
| H | 3.412539  | 9.440403  | 41.021702 |
| H | 2.828258  | 10.997344 | 41.627807 |
| H | 6.995949  | 10.185141 | 44.325156 |
| H | 7.901256  | 11.657570 | 42.435411 |
| H | 6.212456  | 11.946734 | 40.587613 |
| H | 12.489774 | 13.154593 | 41.199795 |
| H | 11.348843 | 12.184074 | 40.217953 |
| H | 11.504028 | 14.829287 | 42.657149 |
| H | 9.897701  | 14.623288 | 43.263042 |
| H | 13.652190 | 19.333469 | 48.681096 |
| H | 13.846481 | 19.024562 | 50.414400 |
| H | 11.950033 | 17.573841 | 47.261573 |
| H | 10.128128 | 16.005670 | 47.978759 |
| H | 9.119686  | 14.910730 | 50.341860 |
| H | 9.605176  | 14.764451 | 52.781173 |
| H | 11.513089 | 16.013542 | 53.757481 |
| H | 12.960236 | 17.436788 | 52.351220 |
| H | 9.520186  | 6.849938  | 39.186458 |
| H | 8.779917  | 8.415747  | 38.881262 |
| H | 7.390860  | 7.517260  | 42.190901 |
| H | 5.095659  | 6.522832  | 42.064063 |
| H | 3.438683  | 5.282596  | 40.205610 |
| H | 3.339862  | 4.678009  | 37.791873 |
| H | 5.250839  | 5.174913  | 36.290985 |
| H | 7.289253  | 6.279391  | 37.137202 |
| H | 7.404096  | 13.522608 | 44.759144 |
| H | 6.309830  | 14.154598 | 46.006915 |
| H | 4.027212  | 8.640869  | 48.504887 |
| C | 7.389299  | 21.281498 | 44.289507 |
| N | 8.562658  | 20.820960 | 44.999044 |
| C | 9.644932  | 21.524546 | 45.300972 |
| N | 9.843774  | 22.772488 | 44.859962 |
| N | 10.587319 | 20.958309 | 46.083040 |
| H | 6.720405  | 20.422489 | 44.174073 |
| H | 6.853610  | 22.057352 | 44.849734 |
| H | 7.640042  | 21.660024 | 43.291868 |
| H | 8.580853  | 19.851060 | 45.347272 |
| H | 10.548534 | 23.312331 | 45.341443 |
| H | 9.059644  | 23.324914 | 44.532500 |
| H | 11.519612 | 21.341049 | 46.036265 |
| H | 10.517882 | 19.953012 | 46.201318 |
| O | 9.172361  | 18.396208 | 46.159258 |



|   |          |           |           |
|---|----------|-----------|-----------|
| H | 9.053299 | 17.485259 | 45.747728 |
| H | 8.796667 | 18.304258 | 47.043855 |
| O | 8.049000 | 24.956000 | 44.152000 |
| H | 8.373460 | 25.848173 | 43.968679 |
| H | 7.089698 | 25.051747 | 44.077355 |

### Cartesian coordinates of Mono-Fe2(II)-S2:

153

|    |           |           |           |
|----|-----------|-----------|-----------|
| Fe | 3.696259  | 8.757990  | 44.116514 |
| C  | 5.509781  | 6.613730  | 50.845245 |
| C  | 4.679072  | 7.828462  | 50.398828 |
| O  | 5.073626  | 8.478084  | 49.400781 |
| O  | 3.640065  | 8.096642  | 51.095603 |
| H  | 5.173067  | 5.680679  | 50.367543 |
| C  | 8.044824  | 6.557440  | 46.983571 |
| C  | 7.197139  | 6.590010  | 45.713893 |
| C  | 6.054790  | 7.569843  | 45.628047 |
| O  | 6.153528  | 8.622435  | 46.374533 |
| O  | 5.110356  | 7.364729  | 44.825060 |
| H  | 8.679154  | 7.444420  | 47.147180 |
| C  | 7.754754  | 9.961368  | 50.578742 |
| C  | 7.658559  | 10.939853 | 49.483193 |
| N  | 6.567220  | 11.027769 | 48.664752 |
| C  | 8.514453  | 11.930035 | 49.073944 |
| C  | 6.737675  | 12.021177 | 47.797110 |
| N  | 7.916165  | 12.584482 | 48.028182 |
| H  | 8.477626  | 10.363692 | 51.265001 |
| C  | 6.343271  | 8.914038  | 57.360283 |
| C  | 5.609332  | 9.274879  | 56.105780 |
| C  | 5.363355  | 10.615959 | 55.783377 |
| C  | 5.185428  | 8.302991  | 55.198674 |
| C  | 4.734743  | 10.981550 | 54.596204 |
| C  | 4.548083  | 8.647436  | 54.014796 |
| C  | 4.331238  | 9.991660  | 53.690173 |
| O  | 3.749743  | 10.359153 | 52.519423 |
| H  | 7.068568  | 9.698540  | 57.537609 |
| C  | -0.503276 | 8.501157  | 41.987529 |
| C  | 0.320090  | 7.223664  | 41.918930 |
| C  | 1.645608  | 7.175916  | 42.677802 |
| O  | 2.013252  | 8.283241  | 43.235406 |
| O  | 2.300709  | 6.117957  | 42.701824 |
| H  | -0.845304 | 8.715486  | 43.001080 |
| C  | 2.273545  | 13.091933 | 45.253097 |
| C  | 2.994982  | 12.324456 | 46.351480 |
| C  | 3.466678  | 10.936021 | 45.959402 |
| O  | 2.791116  | 10.307752 | 45.087968 |
| O  | 4.511035  | 10.486774 | 46.516482 |
| H  | 2.831130  | 13.047393 | 44.304230 |
| C  | 3.669896  | 10.413990 | 41.108839 |
| C  | 4.903607  | 10.570246 | 41.907985 |
| N  | 5.135428  | 9.945244  | 43.115613 |

|   |           |           |           |
|---|-----------|-----------|-----------|
| C | 6.001180  | 11.325075 | 41.585406 |
| C | 6.350896  | 10.325186 | 43.503205 |
| N | 6.897109  | 11.150977 | 42.601828 |
| H | 3.858928  | 10.924995 | 40.169708 |
| C | 11.515561 | 13.138882 | 40.728767 |
| C | 10.428692 | 13.336473 | 41.760949 |
| O | 9.377487  | 12.673588 | 41.754568 |
| N | 10.667511 | 14.297220 | 42.672301 |
| H | 11.464496 | 13.953923 | 39.987329 |
| C | 13.705491 | 18.476329 | 49.604809 |
| C | 12.510874 | 17.574203 | 49.591407 |
| C | 11.821919 | 17.173770 | 48.469565 |
| C | 11.900085 | 16.881388 | 50.693100 |
| N | 10.826118 | 16.293263 | 48.803125 |
| C | 10.848802 | 16.083722 | 50.156249 |
| C | 12.124811 | 16.841786 | 52.083513 |
| C | 10.043293 | 15.267169 | 50.953612 |
| C | 11.329221 | 16.025857 | 52.876237 |
| C | 10.299963 | 15.242520 | 52.317339 |
| H | 14.589104 | 17.942521 | 49.233391 |
| C | 8.850842  | 7.616187  | 39.662439 |
| C | 7.530657  | 7.050198  | 40.104856 |
| C | 7.063116  | 7.006408  | 41.395822 |
| C | 6.478871  | 6.470754  | 39.298322 |
| N | 5.811223  | 6.453759  | 41.447775 |
| C | 5.414331  | 6.121191  | 40.180963 |
| C | 6.300343  | 6.205848  | 37.925796 |
| C | 4.212953  | 5.554381  | 39.745913 |
| C | 5.110668  | 5.630319  | 37.487354 |
| C | 4.074279  | 5.311717  | 38.385964 |
| H | 9.447040  | 8.058237  | 40.488699 |
| C | 6.968093  | 14.497674 | 45.303877 |
| C | 8.299734  | 15.119056 | 45.701382 |
| O | 8.800342  | 16.003750 | 44.950589 |
| O | 8.848186  | 14.710137 | 46.779778 |
| H | 6.495139  | 14.991929 | 44.451835 |
| H | 6.560270  | 6.749603  | 50.574035 |
| H | 5.430341  | 6.458180  | 51.925232 |
| H | 7.416104  | 6.430990  | 47.869389 |
| H | 8.715498  | 5.691551  | 46.923450 |
| H | 6.764230  | 5.602546  | 45.510795 |
| H | 7.828172  | 6.807725  | 44.838474 |
| H | 6.801032  | 9.855708  | 51.098918 |
| H | 8.073580  | 8.973227  | 50.232077 |
| H | 5.776630  | 10.382520 | 48.710778 |
| H | 6.033135  | 12.289822 | 47.032297 |
| H | 8.288937  | 13.440942 | 47.494594 |
| H | 9.492524  | 12.206148 | 49.444762 |
| H | 5.687054  | 8.852750  | 58.238839 |
| H | 6.872024  | 7.959386  | 57.268044 |
| H | 5.690221  | 11.400950 | 56.468536 |
| H | 4.570453  | 12.032064 | 54.356784 |
| H | 3.676789  | 9.544068  | 51.941009 |
| H | 4.228386  | 7.885845  | 53.310088 |
| H | 5.372671  | 7.249220  | 55.410838 |
| H | 0.069962  | 9.369637  | 41.644783 |
| H | -1.393141 | 8.415688  | 41.351337 |

|   |           |           |           |
|---|-----------|-----------|-----------|
| H | 0.574951  | 6.998629  | 40.872783 |
| H | -0.268733 | 6.361825  | 42.260044 |
| H | 1.274009  | 12.690049 | 45.063432 |
| H | 2.166273  | 14.145315 | 45.539558 |
| H | 2.349240  | 12.207152 | 47.234370 |
| H | 3.865844  | 12.885268 | 46.706095 |
| H | 3.449298  | 9.364594  | 40.894093 |
| H | 2.792194  | 10.855687 | 41.594207 |
| H | 6.860811  | 10.027784 | 44.406350 |
| H | 7.820371  | 11.569476 | 42.635900 |
| H | 6.214763  | 11.947911 | 40.726997 |
| H | 12.510764 | 13.162429 | 41.189210 |
| H | 11.371035 | 12.177738 | 40.229355 |
| H | 11.529912 | 14.818847 | 42.666700 |
| H | 9.959084  | 14.563827 | 43.342151 |
| H | 13.560666 | 19.354696 | 48.963393 |
| H | 13.931769 | 18.839798 | 50.611829 |
| H | 11.977904 | 17.448313 | 47.432821 |
| H | 10.226508 | 15.821077 | 48.137453 |
| H | 9.236564  | 14.677584 | 50.523090 |
| H | 9.690134  | 14.612802 | 52.964123 |
| H | 11.497899 | 15.991429 | 53.951925 |
| H | 12.910974 | 17.443309 | 52.539357 |
| H | 9.477093  | 6.848638  | 39.184921 |
| H | 8.708149  | 8.406677  | 38.912352 |
| H | 7.548230  | 7.345161  | 42.301564 |
| H | 5.260491  | 6.326683  | 42.283147 |
| H | 3.417230  | 5.322259  | 40.451431 |
| H | 3.149053  | 4.870972  | 38.013474 |
| H | 4.971244  | 5.423363  | 36.426562 |
| H | 7.081123  | 6.443965  | 37.203555 |
| H | 7.120388  | 13.444126 | 45.046466 |
| H | 6.280155  | 14.541728 | 46.153382 |
| H | 5.334817  | 9.284709  | 46.321623 |
| C | 7.397264  | 21.269380 | 44.290757 |
| N | 8.529780  | 20.802720 | 45.057247 |
| C | 9.619490  | 21.496093 | 45.354698 |
| N | 9.840503  | 22.723556 | 44.867749 |
| N | 10.537748 | 20.942832 | 46.171791 |
| H | 6.720405  | 20.422489 | 44.174073 |
| H | 6.854973  | 22.069063 | 44.809026 |
| H | 7.693243  | 21.612036 | 43.292619 |
| H | 8.525273  | 19.838325 | 45.413776 |
| H | 10.541970 | 23.276276 | 45.339476 |
| H | 9.064381  | 23.269203 | 44.510032 |
| H | 11.474763 | 21.313250 | 46.135777 |
| H | 10.454590 | 19.942230 | 46.318934 |
| O | 9.134292  | 18.338559 | 46.220319 |
| H | 9.075084  | 17.458502 | 45.756598 |
| H | 8.739609  | 18.171498 | 47.087876 |
| O | 8.049000  | 24.956000 | 44.152000 |
| H | 8.371586  | 25.790096 | 43.784446 |
| H | 7.097691  | 24.996055 | 43.978985 |

### Cartesian coordinates of Mono-Fe<sub>2</sub>(II)-S<sub>3</sub>:

153

|    |           |           |           |
|----|-----------|-----------|-----------|
| Fe | 3.997619  | 8.660188  | 44.338047 |
| C  | 5.549189  | 6.721100  | 50.414285 |
| C  | 4.520595  | 7.804319  | 50.033077 |
| O  | 4.704525  | 8.455205  | 48.959906 |
| O  | 3.565188  | 8.000516  | 50.851336 |
| H  | 5.173067  | 5.680679  | 50.367543 |
| C  | 8.173493  | 6.477381  | 47.011677 |
| C  | 7.315645  | 6.401735  | 45.754812 |
| C  | 6.289869  | 7.510936  | 45.567767 |
| O  | 6.490585  | 8.648553  | 46.015779 |
| O  | 5.243049  | 7.189669  | 44.859689 |
| H  | 8.679154  | 7.444420  | 47.147180 |
| C  | 7.840587  | 9.860437  | 50.554117 |
| C  | 7.774228  | 10.728653 | 49.365734 |
| N  | 6.944249  | 10.497681 | 48.302141 |
| C  | 8.439304  | 11.891441 | 49.067035 |
| C  | 7.085820  | 11.467150 | 47.400445 |
| N  | 7.990557  | 12.327589 | 47.849979 |
| H  | 8.477626  | 10.363692 | 51.265001 |
| C  | 6.390252  | 8.881442  | 57.309077 |
| C  | 5.680735  | 9.204308  | 56.027726 |
| C  | 5.408284  | 10.533019 | 55.676581 |
| C  | 5.278482  | 8.207207  | 55.136212 |
| C  | 4.767332  | 10.859295 | 54.485182 |
| C  | 4.628938  | 8.512381  | 53.945387 |
| C  | 4.373415  | 9.845913  | 53.602211 |
| O  | 3.758195  | 10.196919 | 52.443646 |
| H  | 7.068568  | 9.698540  | 57.537609 |
| C  | -0.278173 | 8.666037  | 42.070785 |
| C  | 0.699905  | 7.502093  | 42.062175 |
| C  | 1.949837  | 7.605918  | 42.923281 |
| O  | 2.119311  | 8.678892  | 43.627107 |
| O  | 2.792319  | 6.683169  | 42.888346 |
| H  | -0.845304 | 8.715486  | 43.001080 |
| C  | 2.090827  | 13.002353 | 45.117915 |
| C  | 2.649671  | 12.595615 | 46.474066 |
| C  | 3.124840  | 11.170009 | 46.646300 |
| O  | 3.333652  | 10.386229 | 45.729861 |
| O  | 3.316380  | 10.879283 | 47.937632 |
| H  | 2.831130  | 13.047393 | 44.304230 |
| C  | 3.680904  | 10.410148 | 41.114403 |
| C  | 4.927077  | 10.546184 | 41.902604 |
| N  | 5.176172  | 9.956467  | 43.128137 |
| C  | 6.031621  | 11.267380 | 41.530499 |
| C  | 6.408721  | 10.322139 | 43.468331 |
| N  | 6.950679  | 11.107853 | 42.528229 |
| H  | 3.858928  | 10.924995 | 40.169708 |
| C  | 11.540136 | 13.107182 | 40.686604 |
| C  | 10.444696 | 13.238210 | 41.714741 |
| O  | 9.416768  | 12.543618 | 41.673529 |
| N  | 10.645209 | 14.175259 | 42.660838 |

|   |           |           |           |
|---|-----------|-----------|-----------|
| H | 11.464496 | 13.953923 | 39.987329 |
| C | 13.685715 | 18.463743 | 49.572130 |
| C | 12.501192 | 17.548992 | 49.545758 |
| C | 11.817786 | 17.147414 | 48.419934 |
| C | 11.880511 | 16.861898 | 50.645386 |
| N | 10.813615 | 16.274916 | 48.750167 |
| C | 10.822863 | 16.074991 | 50.104211 |
| C | 12.099890 | 16.818974 | 52.036327 |
| C | 9.994425  | 15.280477 | 50.899563 |
| C | 11.285000 | 16.019515 | 52.827119 |
| C | 10.240449 | 15.257763 | 52.265424 |
| H | 14.589104 | 17.942521 | 49.233391 |
| C | 8.876051  | 7.609184  | 39.654155 |
| C | 7.567653  | 7.015445  | 40.088170 |
| C | 7.085853  | 6.983838  | 41.375790 |
| C | 6.543465  | 6.394741  | 39.280602 |
| N | 5.853788  | 6.388822  | 41.424156 |
| C | 5.481387  | 6.026563  | 40.159015 |
| C | 6.389606  | 6.102716  | 37.909864 |
| C | 4.309295  | 5.404729  | 39.719607 |
| C | 5.226366  | 5.480514  | 37.468701 |
| C | 4.193446  | 5.135892  | 38.363205 |
| H | 9.447040  | 8.058237  | 40.488699 |
| C | 6.999210  | 14.400244 | 45.219595 |
| C | 8.236646  | 15.097429 | 45.766694 |
| O | 8.687883  | 16.089403 | 45.128283 |
| O | 8.762043  | 14.631749 | 46.833141 |
| H | 6.495139  | 14.991929 | 44.451835 |
| H | 6.426315  | 6.776712  | 49.768287 |
| H | 5.865423  | 6.877855  | 51.451319 |
| H | 7.565999  | 6.301614  | 47.904267 |
| H | 8.942970  | 5.695523  | 46.981491 |
| H | 6.800144  | 5.435294  | 45.696371 |
| H | 7.956988  | 6.446123  | 44.860523 |
| H | 6.854823  | 9.729132  | 51.009326 |
| H | 8.257364  | 8.872970  | 50.329186 |
| H | 6.319424  | 9.694308  | 48.217644 |
| H | 6.559757  | 11.522924 | 46.463501 |
| H | 8.277625  | 13.252810 | 47.376078 |
| H | 9.198235  | 12.417297 | 49.625648 |
| H | 5.697099  | 8.772957  | 58.155053 |
| H | 6.969478  | 7.954459  | 57.235848 |
| H | 5.715746  | 11.339378 | 56.344919 |
| H | 4.574254  | 11.899753 | 54.226196 |
| H | 3.659517  | 9.388930  | 51.870035 |
| H | 4.319241  | 7.721819  | 53.266814 |
| H | 5.480441  | 7.161031  | 55.372268 |
| H | 0.233762  | 9.625389  | 41.939860 |
| H | -1.004325 | 8.558096  | 41.254757 |
| H | 1.070758  | 7.326471  | 41.042444 |
| H | 0.196111  | 6.566415  | 42.341858 |
| H | 1.288908  | 12.327914 | 44.798268 |
| H | 1.662295  | 14.007990 | 45.209100 |
| H | 1.903887  | 12.772015 | 47.259793 |
| H | 3.499941  | 13.234083 | 46.759231 |
| H | 3.446120  | 9.365086  | 40.893757 |
| H | 2.814374  | 10.856720 | 41.613916 |

|   |           |           |           |
|---|-----------|-----------|-----------|
| H | 6.919281  | 10.006544 | 44.366115 |
| H | 7.881811  | 11.508460 | 42.526509 |
| H | 6.233673  | 11.860187 | 40.647765 |
| H | 12.533886 | 13.133177 | 41.147658 |
| H | 11.412805 | 12.171004 | 40.139694 |
| H | 11.476053 | 14.745641 | 42.666176 |
| H | 9.914843  | 14.397367 | 43.320192 |
| H | 13.545234 | 19.329263 | 48.912835 |
| H | 13.881490 | 18.845835 | 50.578738 |
| H | 11.982707 | 17.415931 | 47.382633 |
| H | 10.206665 | 15.806471 | 48.087534 |
| H | 9.172882  | 14.713642 | 50.465833 |
| H | 9.611415  | 14.645468 | 52.910360 |
| H | 11.451861 | 15.980152 | 53.902785 |
| H | 12.898369 | 17.402916 | 52.493873 |
| H | 9.525161  | 6.858990  | 39.181222 |
| H | 8.722877  | 8.400920  | 38.907364 |
| H | 7.548286  | 7.354317  | 42.281466 |
| H | 5.262040  | 6.335957  | 42.240615 |
| H | 3.517120  | 5.142891  | 40.418597 |
| H | 3.291346  | 4.651359  | 37.989489 |
| H | 5.105446  | 5.254768  | 36.409569 |
| H | 7.170688  | 6.357937  | 37.193269 |
| H | 7.290077  | 13.442211 | 44.773115 |
| H | 6.292294  | 14.192328 | 46.028536 |
| H | 3.650129  | 9.957718  | 48.077912 |
| C | 7.387914  | 21.279311 | 44.267895 |
| N | 8.535708  | 20.838621 | 45.025785 |
| C | 9.635326  | 21.538473 | 45.266661 |
| N | 9.837273  | 22.753610 | 44.741110 |
| N | 10.580748 | 21.000813 | 46.061930 |
| H | 6.720405  | 20.422489 | 44.174073 |
| H | 6.843005  | 22.083020 | 44.777382 |
| H | 7.668203  | 21.606380 | 43.260282 |
| H | 8.531228  | 19.893535 | 45.430616 |
| H | 10.576662 | 23.303132 | 45.155485 |
| H | 9.046656  | 23.312421 | 44.425136 |
| H | 11.513618 | 21.379338 | 46.002601 |
| H | 10.505782 | 20.003893 | 46.233595 |
| O | 9.134791  | 18.420286 | 46.299279 |
| H | 9.013181  | 17.513540 | 45.899383 |
| H | 8.796917  | 18.329692 | 47.199532 |
| O | 8.049000  | 24.956000 | 44.152000 |
| H | 8.434571  | 25.637028 | 43.585283 |
| H | 7.124038  | 24.938529 | 43.867878 |
